# Supplementary material for: In situ assembly of monodispersed Ag nanoparticles in the channels of ordered mesopolymers as a highly active and reusable hydrogenation catalyst
Source: Royal Society of Chemistry journal article supplement (doi:10.1039/c4ta06049k), 2014-12-09
Supplement: c4ta06049k1.pdf [file c4ta06049k1.pdf]

## Electronic Supplementary Information

### ***In-situ* assembly of monodispersed Ag nanoparticles in the channels of ordered mesopolymers as highly active and reusable hydrogenation catalyst**

Xianchun Liu,<sup>a, b</sup> Renxi Jin,<sup>b</sup> Dashu Chen,<sup>b</sup> Lin Chen,<sup>b</sup> Shuangxi Xing,<sup>b</sup>  
Hongzhu Xing,<sup>b</sup> Yan Xing<sup>b</sup> and Zhongmin Su<sup>\*a, b</sup>

<sup>a</sup> College of Chemistry, Jilin University, Changchun, 130012, China; E-mail: zmsu@nenu.edu.cn.

<sup>b</sup> Department of Chemistry, Northeast Normal University, Changchun, 130024, China

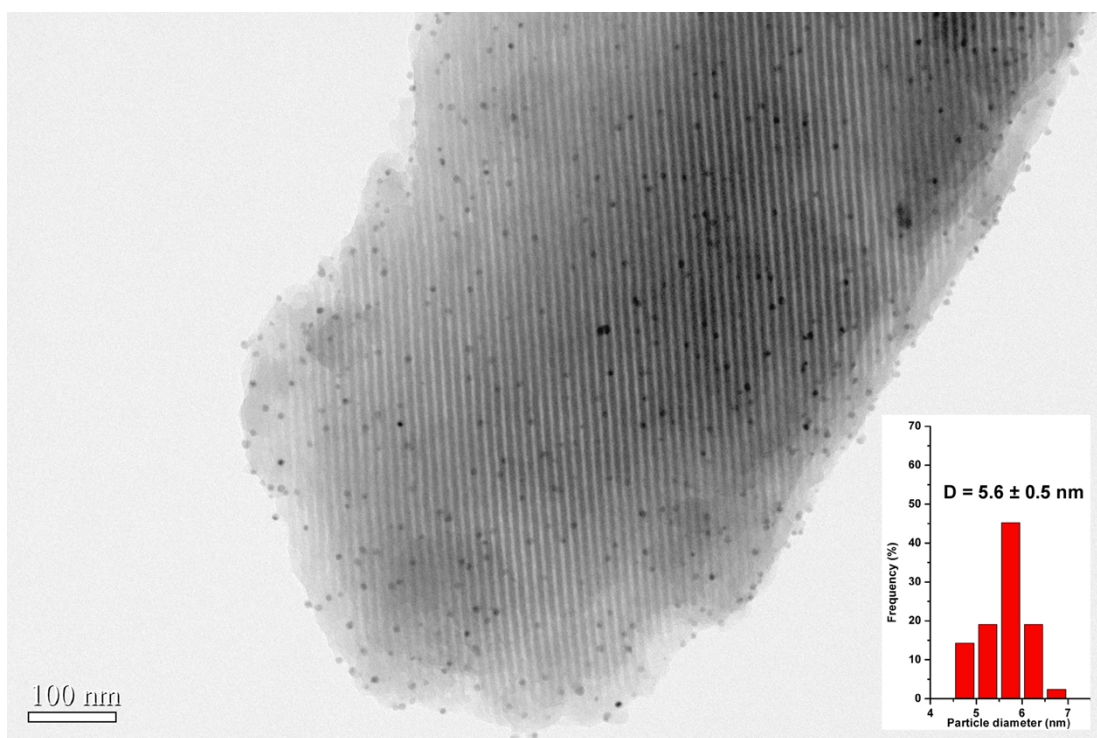

Fig. S1 The size distribution of Ag NPs calculated from the corresponding TEM image.

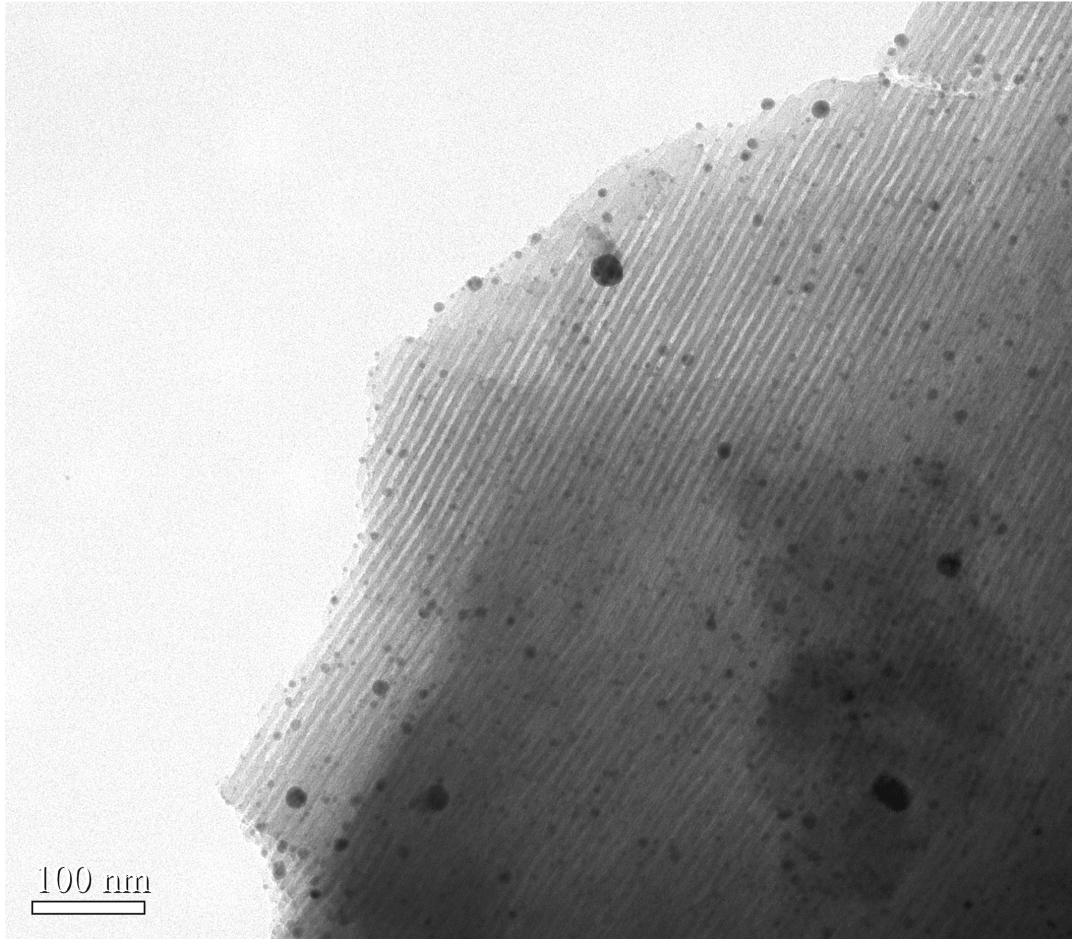

Fig. S2 TEM image of as-prepared Ag@FDU-15 nanocomposites by using  $\text{AgNO}_3$  as the silver source.

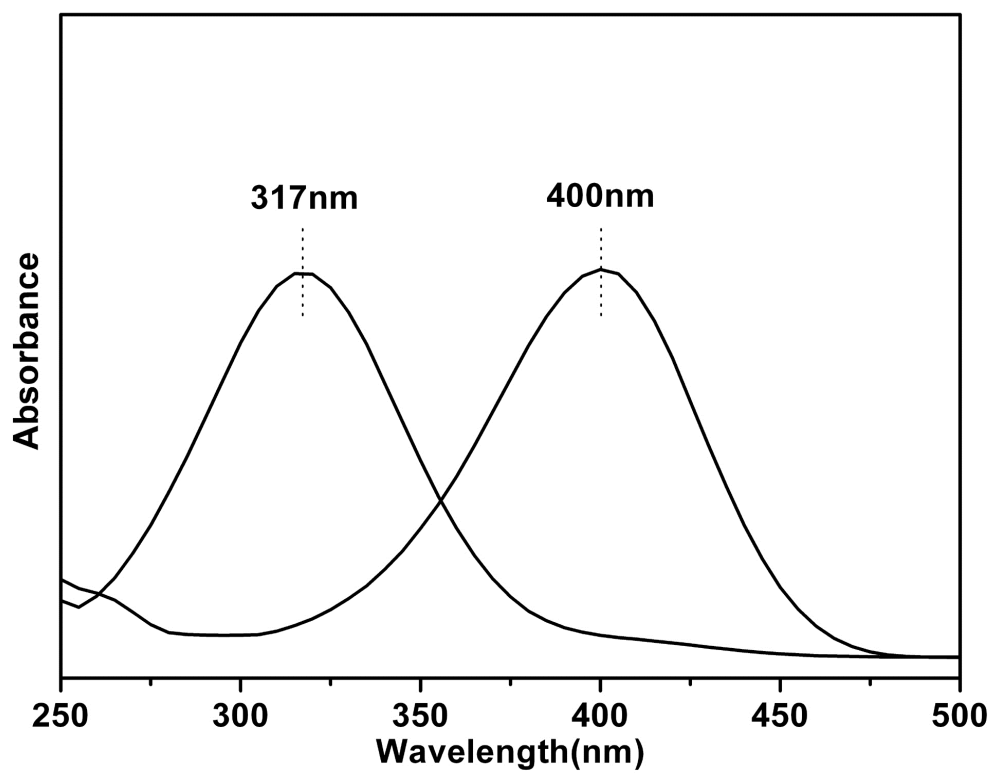

Fig. S3 UV/Vis spectra of 4-NP before and after the addition of an aqueous solution of NaBH<sub>4</sub>.
